# Supplementary material for: Improved Risk-Adjusted Survival for Melanoma Brain Metastases in the Era of Checkpoint Blockade Immunotherapies: Results from a National Cohort
Source: Oxford University Press journal article supplement (doi:10.1158/2326-6066.cir-18-0067), 2018-07-12
Supplement: 23266066cir180067-sup-196814_2_supp_4808196_p9xbxl.xlsx [file 23266066cir180067-sup-196814_2_supp_4808196_p9xbxl.xlsx]

## Sheet: Sheet4
Supplemental Table 4. Characteristics of MBM patients that received checkpoint blockade immunotherapy
				% of MBM patients that received CBI
						univariate χ2 p-value
		total (n)	% received CBI	Multivar Logistic Regression
				OR	95%CI	p-value
Sex						0.94
	Male	1605	20.5	Reference
	Female	624	20.4	1	0.73-1.36	1
Age (yr)						<0.001
	20-29	49	28.6	no observations in multivar
	30-39	100	32	no observations in multivar
	40-49	248	23.4	1.66	1.04-2.65	0.03
	50-59	552	21	Reference
	60-69	623	21	1.34	0.92-1.94	0.13
	70-79	410	19.3	0.57	0.38-0.86	0.007
	80-89	228	9.7	0.23	0.12-0.43	<0.001
	90+	19	21.1	1.25	0.30-5.17	0.76
Year of Diagnosis						<0.001
	2011	438	10.5	Reference
	2012	379	14	1.31	0.77-2.22	0.32
	2013	450	18.7	1.97	1.22-3.19	0.006
	2014	462	22.3	2.92	1.83-4.66	<0.001
	2015	500	34	4.95	3.16-7.77	<0.001
Comorbidity Index						<0.001
	0	1621	23.2	Reference
	1	401	15.5	0.65	0.45-0.94	0.023
	2	127	10.2	0.45	0.23-0.88	0.02
	3	80	6.3	0.19	0.05-0.64	0.01
Race/Ethnicity						0.5
	White	2105	20.6	Reference
	Black	23	21.7	2.49	0.72-8.68	0.15
	Asian/Pacific islander	9	0	omitted due to 0 events
	Hispanic	65	16.9	0.98	0.43-2.23	0.97
	Other/Unknown	27	25.9	0.93	0.29-2.98	0.9
Primary Payor						<0.001
	Not insured	140	11.4	Reference
	Private insurance	888	26.1	2.7	1.31-5.58	0.007
	Medicaid	230	12.2	0.93	0.38-2.25	0.87
	Medicare	882	18.6	3.05	1.40-6.64	0.005
	Other government	48	18.8	1.79	0.56-5.73	0.32
	Unknown status	41	17.1	1.6	0.44-5.84	0.47
Facility Type						0.001
	Community program	135	8.9	Reference
	Cancer center	802	18.1	1.34	0.68-2.67	0.4
	Academic/Research	884	23	1.43	0.72-2.86	0.31
	Integrated network	259	19.3	1.15	0.53-2.48	0.72
Facility Location						<0.001
	New England	104	27.9	Reference
	Middle Atlantic	267	24	0.58	0.31-1.08	0.08
	South Atlantic	491	19.1	0.53	0.29-0.96	0.04
	East North Central	326	15	0.29	0.15-0.55	<0.001
	East South Central	149	16.8	0.37	0.17-0.78	0.01
	West North Central	164	17.7	0.45	0.22-0.93	0.03
	West South Central	153	11.1	0.32	0.15-0.71	0.005
	Mountain	132	33.3	1.31	0.65-2.64	0.44
	Pacific	294	20.1	0.57	0.30-1.08	0.08
Primary Lesion Site						0.57
	Upper limb/Shoulder	104	23.1	Reference
	Lower limb/Hip	78	18	0.51	0.20-1.30	0.16
	Trunk	235	17.5	0.48	0.22-1.03	0.06
	Face	34	23.5	1.13	0.31-4.07	0.86
	Scalp/Neck	60	30	1.33	0.51-3.47	0.56
	Ear	18	22.2	0.56	0.09-3.34	0.53
	Lip	1	0	omitted due to 0 events
	Eyelid	0	0	no observations in multivar
	Overlapping sites	3	0	omitted due to 0 events
	NOS	1696	20.5	0.63	0.33-1.20	0.16
Targeted Therapy
	No	1556	24.9	Reference
	Yes	603	9.8	0.18	0.12-0.26	<0.001
Resection of Metastasis						0.01
	No	1382	18.6	Reference
	Yes	835	23.4	1.34	1.00-1.80	0.05
Brain-directed RT Modality						<0.001
	None	579	7.4	Reference
	Single-fraction SRS	404	36.4	7.73	4.92-12.13	<0.001
	Hypofractionated SRT	196	24.5	3.27	1.91-5.60	<0.001
	WBRT	638	20.4	4.16	2.70-6.39	<0.001
	Other RT regimen	232	22.4	3.8	2.26-6.37	<0.001
Site of Extracranial Mets						<0.001
	MBM-only	880	15.6	Reference
	Lung	1106	22.8	2.36	1.74-3.21	<0.001
	Liver	110	29.1	3.39	1.86-6.18	<0.001
	Bone	82	26.8	2.82	1.24-6.38	0.01
	Distant Subcut/Skin/LN	40	25	2.19	0.85-5.65	0.1
