# Supplementary material for: Improved Risk-Adjusted Survival for Melanoma Brain Metastases in the Era of Checkpoint Blockade Immunotherapies: Results from a National Cohort
Source: Oxford University Press journal article supplement (doi:10.1158/2326-6066.cir-18-0067), 2018-07-12
Supplement: 23266066cir180067-sup-196814_2_supp_4808197_p9xvxl.xlsx [file 23266066cir180067-sup-196814_2_supp_4808197_p9xvxl.xlsx]

## Sheet: Sheet5
Supplemental Table 5. Multivariable proportional hazards for OS in patients with MBM-only disease
		Multivariate Cox Regression
		HR	95%CI	p-value
Sex
	Female (Ref male)	0.831151	0.66-1.04	0.111
Age (yr)
	20-29	no observations in multivar
	30-39	no observations in multivar
	40-49	0.51694	0.35-0.76	0.001
	50-59	0.669702	0.51-0.89	0.005
	60-69	Reference
	70-79	1.24012	0.90-1.71	0.187
	80-89	1.39022	0.94-2.06	0.1
	90+	1.67112	0.63-4.41	0.3
Year of Diagnosis
	per year	1	0.92-1.10	0.929
Comorbidity Index
	0	Reference
	1	1.4019	1.09-1.81	0.01
	2	1.8478	1.25-2.73	0.002
	3	1.91386	1.22-3.00	0.005
Race/Ethnicity
	White	Reference
	Black	1.13135	0.34-3.78	0.841
	Asian/Pacific islander	1.07395	0.14-8.27	0.945
	Hispanic	1.04868	0.52-2.12	0.895
	Other/Unknown	0.667106	0.30-1.49	0.325
Primary Payor
	Not insured	Reference
	Private insurance	0.777257	0.51-1.19	0.247
	Medicaid	1.01378	0.61-1.67	0.957
	Medicare	0.740987	0.46-1.20	0.227
	Other government	0.810886	0.38-1.72	0.585
	Unknown status	1.02136	0.45-2.33	0.96
Primary Lesion Site
	Upper limb/shoulder	Reference
	Lower limb/hip	0.704005	0.35-1.43	0.33
	Trunk	0.651452	0.37-1.15	0.141
	Scalp/neck	0.705981	0.29-1.73	0.447
	Face	1.17565	0.46-2.97	0.733
	Ear	1.39555	0.31-6.36	0.667
	Lip	omitted due to 0 events
	Eyelid	no observations in multivar
	Overlapping sites	19.4809	1.66-229.13	0.018
	NOS	0.834134	0.50-1.38	0.483
Facility Type
	Community program	Reference
	Cancer center	0.751222	0.50-1.12	0.159
	Academic/Research	0.659296	0.44-0.99	0.042
	Integrated network	0.711671	0.44-1.15	0.163
Facility Location
	New England	Reference
	Middle Atlantic	1.19195	0.67-2.11	0.545
	South Atlantic	1.14685	0.66-1.99	0.627
	East North Central	1.10159	0.63-1.93	0.734
	East South Central	1.14999	0.61-2.16	0.663
	West North Central	1.31285	0.71-2.41	0.381
	West South Central	1.00598	0.53-1.91	0.985
	Mountain	1.53391	0.79-2.97	0.204
	Pacific	1.03677	0.58-1.84	0.902
Checkpoint Blockade Immunotherapy
	Yes (Ref no)	0.423239	0.29-0.63	<0.001
Resection of Metastasis
	Yes (Ref no)	0.485819	0.39-0.61	<0.001
Targeted Therapy
	Yes (Ref no)	0.845626	0.66-1.09	0.189
Brain-directed RT Modality
	None	Reference
	Single-fraction SRS	0.53161	0.39-0.73	<0.001
	Hypofractionated SRT	0.878155	0.60-1.28	0.498
	WBRT	1.12199	0.86-1.46	0.392
	Other RT regimen	0.789977	0.55-1.13	0.191
