# Supplementary material for: Improved Risk-Adjusted Survival for Melanoma Brain Metastases in the Era of Checkpoint Blockade Immunotherapies: Results from a National Cohort
Source: Oxford University Press journal article supplement (doi:10.1158/2326-6066.cir-18-0067), 2018-07-12
Supplement: 23266066cir180067-sup-196814_2_supp_4808200_p9xlyh.xlsx [file 23266066cir180067-sup-196814_2_supp_4808200_p9xlyh.xlsx]

## Sheet: Sheet2
Supplemental Table 2. Characteristics of MBM patients with and without extracranial metastases
			MBM-only		MBM+
					Extracranial Mets
			total (n)		total (n)	univariate χ2 or t test p-value
			%		%	Multivar Logistic Regression
						OR	95%CI		p-value
Sex			888		1359				0.22
	Female (Ref male)		29.4		27	1.16	0.97-1.39		0.11
Age (yr)			888		1359				0.003
	median, yr (IQR)		61 (52-70)		63 (53-72)
	20-29		2.1		2.2	no observations in multivar
	30-39		5.5		3.8	no observations in multivar
	40-49		11.5		11	1.04	0.78-1.39		0.8
	50-59		26.8		23.2	1.28	1.02-1.61		0.04
	60-69		27.6		28.4	Reference
	70-79		17.2		19.1	0.86	0.67-1.11		0.24
	80-89		8.3		11.5	0.7	0.51-0.96		0.03
	90+		0.9		0.8	1.26	0.53-2.98		0.6
Year of Diagnosis			888		1359				0.56
	median (IQR)		'13 ('12-'14)		'13 ('12-'14)	0.98/yr	0.94-1.03		0.44
Comorbidity Index			888		1359				0.15
	0		70.6		74	Reference
	1		18.8		17.6	1.18	0.95-1.46		0.13
	2		6.1		5.5	1.27	0.91-1.77		0.16
	3		4.5		2.9	1.39	0.92-2.10		0.12
Race/Ethnicity			888		1359				0.22
	White		93.8		94.9	Reference
	Black		0.9		1.1	0.55	0.23-1.32		0.18
	Asian/Pacific islander		0.3		0.4	0.74	0.21-2.58		0.63
	Hispanic		3		2.8	1.03	0.63-1.69		0.9
	Other/Unknown		1.9		0.8	1.91	0.93-3.90		0.08
Primary Payor			888		1359				0.4
	Not insured		6.4		6.1	Reference
	Private insurance		41.3		38.8	1.05	0.73-1.50		0.8
	Medicaid		11		9.7	0.94	0.61-1.44		0.78
	Medicare		37.8		41.1	1.19	0.81-1.77		0.38
	Other government		2		2.2	0.92	0.48-1.76		0.8
	Unknown status		1.4		2.1	0.56	0.26-1.17		0.12
Facility Type			820		1278				0.27
	Community program		5.9		6.9	Reference
	Cancer center		36.6		39.8	1.11	0.79-1.56		0.56
	Academic/Research		44.3		41.3	1.24	0.88-1.75		0.21
	Integrated network		13.3		12	1.26	0.85-1.87		0.25
Facility Location			820		1278				0.63
	New England		4.4		5.5	Reference
	Middle Atlantic		13.2		12.7	1.37	0.89-2.10		0.15
	South Atlantic		23.8		23.4	1.5	0.99-2.26		0.06
	East North Central		14.9		16	1.2	0.78-1.83		0.41
	East South Central		7.7		7.1	1.51	0.94-2.42		0.09
	West North Central		7.3		8.1	1.25	0.78-2.01		0.35
	West South Central		8.4		6.7	1.77	1.10-2.84		0.02
	Mountain		5.5		6.8	1.23	0.75-2.02		0.41
	Pacific		14.9		13.7	1.58	1.03-2.43		0.04
Primary Lesion Site			888		1359				0.36
	Upper limb/Shoulder		4.2		4.9	Reference
	Lower limb/Hip		4.1		3.1	1.55	0.87-2.74		0.14
	Trunk		10.7		10.4	1.12	0.70-1.78		0.65
	Face		1.6		1.5	1.07	0.52-2.21		0.85
	Scalp/Neck		2.9		2.7	1.07	0.58-1.97		0.83
	Ear		0.3		1.1	0.45	0.14-1.47		0.19
	Lip		0.1		0	omitted due to 0 events
	Eyelid		0		0	no observations in multivar
	Overlapping sites		0.2		0.1	4.25	0.35-50.92		0.25
	NOS		75.9		76.3	1.08	0.72-1.61		0.72
AJCC pT*			708		1052				0.02
	is		0.1		0
	0 (i.e. unknown primary)		45.8		44.9
	1		2.7		4.3
	2		3.4		1.7
	3		3.8		2.7
	4		9.5		10.8
	X		34.8		35.7
AJCC pN*			561		815				0.19
	0		11.4		9.7
	1		9.5		8.3
	2		1.8		2.2
	3		4.8		2.8
	X		72.6		76.9
Melanoma Subtype*			68		98				0.06
	Superficial spreading		30.9		15.3
	Nodular		66.2		78.6
	Acral lentiginous		0		3.1
	Lentigo maligna		2.9		3.1
Histology Ulceration*			238		352				0.22
	Yes		36.1		41.2
Mitotic Count*			111		58				0.27
	median, mit/mm2 (IQR)		4 (1-9)		5 (1-10)
LDH Level*			119		248				0.001
	Within normal limits		50.4		31.1
	<1.5x normal		36.1		46
	1.5-10x normal		12.6		14.9
	>10x normal		0.8		8.1
Excision of Primary Lesion*			828		1257				0.05
	None		87.8		91.5
	Local excision		1.8		1.5
	Gross excision		2.9		2.1
	Wide excision		7.5		4.9
Checkpoint Blockade*			880		1349				<0.001
	Yes		15.6		23.7
Targeted Therapy*			850		1317				<0.001
	Yes		22.5		31.5
Resection of Metastasis*			886		1349				<0.001
	Yes		51.8		28.5
Brain-directed RT*			845		1220				0.17
	Yes		69.9		72.7
Brain-directed RT Modality*			845		1220				0.002
	None		30.1		27.3
	Single-fraction SRS		20.2		19.2
	Hypofractionated SRT		11.7		8.1
	WBRT		26.9		33.9
	Other RT regimen		11.1		11.5
Site of Extracranial Mets*			n/a		1348				n/a
	Lung		-		82.6
	Liver		-		8.2
	Bone		-		6.2
	Distant Subcut/Skin/LN		-		3
*Variables missing ≥10% of data and treatment variables were excluded from multivariable regression of clinicopathologic features of presenting with/without extracranial metastasis.
