# Supplementary material for: Improved Risk-Adjusted Survival for Melanoma Brain Metastases in the Era of Checkpoint Blockade Immunotherapies: Results from a National Cohort
Source: Oxford University Press journal article supplement (doi:10.1158/2326-6066.cir-18-0067), 2018-07-12
Supplement: 23266066cir180067-sup-196814_2_supp_4808201_p9xjyh.xlsx [file 23266066cir180067-sup-196814_2_supp_4808201_p9xjyh.xlsx]

## Sheet: Sheet1
Supplemental Table 1. Characteristics of melanoma patients presenting with Stage 1-3 vs. Stage 4 without MBM vs. Stage 4 with MBM disease
		Stage 1-3	Stage 4		In Stage 4 patients,
			without MBM	with MBM	OR of presenting with MBM
		total (n)	total (n)	total (n)	univariate χ2 or t test p-value
		%	%	%	Multivar Logistic Regression
					OR	95%CI	p-value
Sex		212750	4936	2753			<0.001
	Female (Ref male)	44.2	34.2	28.1	0.76	0.68-0.85	<0.001
Age (yr)		212750	4936	2753			<0.001
	median, yr (IQR)	62 (51-72)	64 (54-76)	62 (53-71)
	20-29	3.4	1.7	2.3	no observations in multivar
	30-39	7.2	5	4.6	no observations in multivar
	40-49	12.5	10.6	11.5	0.95	0.79-1.14	0.59
	50-59	21.6	20.4	24.9	1.02	0.88-1.18	0.82
	60-69	25	23.6	28.2	Reference
	70-79	18.4	21.8	18.1	0.68	0.58-0.79	<0.001
	80-89	10.3	14.3	9.6	0.56	0.46-0.67	<0.001
	90+	1.6	2.6	0.8	0.28	0.18-0.45	<0.001
Year of Diagnosis		212750	4936	2753			<0.001
	median (IQR)	'13 ('11-'14)	'13 ('11-'14)	'13 ('11-'14)	1.00/yr	0.97-1.03	0.79
Comorbidity Index		212750	4936	2753			<0.001
	0	87.3	78	72.7	Reference
	1	10.4	16.1	17.7	1.2	1.05-1.37	0.01
	2	1.7	3.8	5.9	1.58	1.25-1.99	<0.001
	3	0.6	2.1	3.7	1.8	1.34-2.42	<0.001
Race/Ethnicity		212750	4936	2753			<0.001
	White	96	93.1	94.4	Reference
	Black	0.5	1.8	0.9	0.55	0.35-0.89	0.02
	Asian/Pacific islander	0.3	0.7	0.5	0.65	0.31-1.36	0.26
	Hispanic	1.4	3.2	2.9	0.89	0.65-1.22	0.47
	Other/Unknown	1.8	1.2	1.2	1.05	0.66-1.67	0.85
Primary Payor		212750	4936	2753			<0.001
	Not insured	2.3	5.3	6.2	Reference
	Private insurance	54.4	38.7	40.3	0.8	0.63-1.01	0.06
	Medicaid	2.6	7.2	10.4	1.17	0.88-1.56	0.27
	Medicare	37.6	45.8	39.2	0.83	0.64-1.06	0.14
	Other government	1.2	1.3	2.2	1.42	0.91-2.23	0.13
	Unknown status	2	1.6	1.8	0.98	0.63-1.51	0.93
Facility Type		190284	4603	2562			<0.001
	Community program	6.3	8.1	6.8	Reference
	Cancer center	34.7	37.9	38.5	1.17	0.96-1.44	0.13
	Academic/Research	50	42.4	42.6	1.17	0.95-1.43	0.14
	Integrated network	8.9	11.6	12.2	1.26	0.99-1.60	0.06
Facility Location		190284	4603	2562			<0.001
	New England	7	4.8	5.2	Reference
	Middle Atlantic	17.2	14.6	13.3	0.82	0.63-1.06	0.13
	South Atlantic	20.5	24.8	22.8	0.77	0.60-1.00	0.05
	East North Central	17.7	15.4	16	0.89	0.69-1.15	0.38
	East South Central	6.3	7	7.5	0.85	0.63-1.14	0.27
	West North Central	8.7	7.6	7.7	0.8	0.60-1.06	0.12
	West South Central	5.4	7	7.4	0.86	0.64-1.15	0.32
	Mountain	5.2	5.6	6.3	0.94	0.69-1.27	0.68
	Pacific	12.1	13.3	13.9	0.9	0.69-1.18	0.46
Primary Lesion Site		212750	4936	2753			<0.001
	Upper limb/Shoulder	24.8	8.5	4.5	Reference
	Lower limb/Hip	17.9	8.8	3.5	0.91	0.67-1.25	0.58
	Trunk	29.5	16.8	10.2	1.14	0.88-1.48	0.32
	Face	13.7	3.7	1.7	1.03	0.70-1.53	0.88
	Scalp/Neck	8.8	7.5	3.1	0.8	0.57-1.11	0.17
	Ear	3.2	1.4	0.8	1.17	0.66-2.06	0.59
	Lip	0.3	0.1	0.1	1.19	0.22-6.53	0.84
	Eyelid	0.5	0.1	0	omitted due to 0 events
	Overlapping sites	0.1	0.2	0.2	1.26	0.32-4.97	0.74
	NOS	1.3	53	75.9	2.87	2.30-3.59	<0.001
AJCC pT*		211217	4239	2204			<0.001
	is	24.9	1.2	0.1
	0 (i.e. unknown primary)	2.6	31	46
	1	38.4	7.3	3.4
	2	15.6	5.1	2
	3	9.6	6.8	3.1
	4	7.4	23.9	10.6
	X	1.5	24.8	34.8
AJCC pN*		184445	3717	1738			<0.001
	0	62.4	20.5	11.1
	1	6.3	14.8	8.5
	2	3	8.1	2.5
	3	1.7	10.1	3.3
	X	26.6	46.4	74.6
Melanoma Subtype*		96348	892	205			<0.001
	Superficial spreading	59.6	23.8	21.5
	Nodular	16.3	66	74.6
	Acral lentiginous	2.4	4.6	1.5
	Lentigo maligna	21.7	5.6	2.4
Histology Ulceration*		196897	2436	735			<0.001
	Yes	14.7	43.9	40
Mitotic Count*		142283	1477	323			<0.001
	median, mit/mm2 (IQR)	1 (<1-2)	5 (1-10)	4 (1-9)
LDH Level*		19111	1066	459			<0.001
	Within normal limits	74.8	47.8	39.7
	<1.5x normal	23.6	34.3	39.9
	1.5-10x normal	0.7	13	14.6
	>10x normal	0.9	5	5.9
Excision of Primary*		197683	4441	2531			<0.001
	None	1.4	65.6	89.5
	Local excision	1.7	2.7	1.7
	Gross excision	38.8	8.5	2.6
	Wide excision	58	23.2	6.2
Checkpoint Blockade*		211894	4888	2734			<0.001
	Yes	3.3	22.9	17.4
Targeted Therapy*		207746	4775	2656			<0.001
	Yes	0.9	24.1	31
Resection of Metastasis*		211903	4912	2737			<0.001
	Yes	1.9	26.4	37.5
Brain-directed RT*		212045	4892	2740			<0.001
	Yes	1.5	19.2	72.9
*Variables missing ≥10% of data and treatment variables were excluded from multivariable regression of clinicopathologic features of presenting with/without MBM.
