# Supplementary material for: Improved Risk-Adjusted Survival for Melanoma Brain Metastases in the Era of Checkpoint Blockade Immunotherapies: Results from a National Cohort
Source: Oxford University Press journal article supplement (doi:10.1158/2326-6066.cir-18-0067), 2018-07-12
Supplement: 23266066cir180067-sup-196814_2_supp_4808204_p9xf5r.xlsx [file 23266066cir180067-sup-196814_2_supp_4808204_p9xf5r.xlsx]

## Sheet: Sheet3
Supplemental Table 3. Multivariable proportional hazards for OS in MBM patients
		Multivariable Cox Regression			Multivariable Cox Regression with CBI Interaction Effects
					Main effects and interaction effects for CBI = No			Interaction effects for CBI = Yes
		HR	95%CI	p-value	HR	95%CI	p-value	HR	95%CI	p-value
Sex
	Female (Ref male)	0.8	0.70-0.92	0.001	0.81	0.70-0.93	0.002
Age* (yr)					for CBI = No			for CBI = Yes
	20-29	no observations in multivar			no observations in multivar			no observations in multivar
	30-39	no observations in multivar			no observations in multivar			no observations in multivar
	40-49	0.92	0.73-1.14	0.443	0.83	0.65-1.06	0.139	1.68	0.85-3.29	0.133
	50-59	0.95	0.80-1.12	0.524	0.94	0.79-1.13	0.535	0.92	0.52-1.62	0.766
	60-69	Reference			Reference			Reference
	70-79	1.08	0.90-1.3	0.42	1	0.82-1.22	0.966	1.56	0.88-2.77	0.129
	80-89	1.22	0.97-1.51	0.084	1.12	0.89-1.41	0.335	1.52	0.57-4.09	0.403
	90+	2.59	1.48-4.53	0.001	2.44	1.33-4.49	0.004	1.47	0.16-13.52	0.733
Year of Diagnosis*					for CBI = No			for CBI = Yes
	2011	Reference			Reference			Reference
	2012	1.09	0.92-1.29	0.312	1.12	0.94-1.34	0.208	0.92	0.51-1.67	0.779
	2013	0.91	0.77-1.08	0.274	0.94	0.79-1.12	0.498	0.79	0.46-1.35	0.385
	2014	0.98	0.83-1.16	0.794	1.04	0.86-1.24	0.707	0.57	0.33-0.98	0.04
Comorbidity Index*					for CBI = No			for CBI = Yes
	0	Reference			Reference			Reference
	1	1.31	1.13-1.53	<0.001	1.48	1.26-1.74	<0.001	0.39	0.22-0.70	0.001
	2	1.59	1.26-2.02	<0.001	1.61	1.26-2.06	<0.001	1.08	0.38-3.08	0.885
	3	1.47	1.11-1.94	0.007	1.6	1.20-2.14	0.001	0.31	0.07-1.42	0.132
Race/Ethnicity
	White	Reference			Reference
	Black	1.5	0.83-2.72	0.179	1.48	0.81-2.69	0.199
	Asian/Pacific islander	1.54	0.62-3.85	0.354	1.58	0.63-3.96	0.331
	Hispanic	0.9	0.58-1.38	0.627	0.92	0.60-1.43	0.719
	Other/Unknown	0.88	0.49-1.59	0.675	0.92	0.51-1.68	0.79
Primary Payor*					for CBI = No			for CBI = Yes
	Not insured	Reference			Reference			Reference
	Private insurance	0.75	0.58-0.96	0.024	0.73	0.56-0.96	0.022	1.7	0.66-4.36	0.269
	Medicaid	0.84	0.62-1.14	0.258	0.79	0.57-1.10	0.161	2.85	0.84-9.65	0.093
	Medicare	0.94	0.71-1.25	0.683	0.94	0.69-1.26	0.66	1.82	0.62-5.36	0.279
	Other government	0.72	0.45-1.16	0.174	0.75	0.45-1.24	0.256	1.63	0.33-7.97	0.544
	Unknown status	0.81	0.49-1.34	0.413	0.83	0.48-1.44	0.515	0.81	0.12-5.67	0.831
Primary Lesion Site
	Upper limb/shoulder	Reference			Reference
	Lower limb/hip	0.83	0.54-1.26	0.375	0.78	0.51-1.21	0.27
	Trunk	0.75	0.53-1.05	0.096	0.7	0.49-0.99	0.043
	Scalp/neck	0.58	0.35-0.95	0.031	0.57	0.35-0.96	0.033
	Face	0.49	0.27-0.89	0.02	0.53	0.29-0.98	0.042
	Ear	0.54	0.27-1.10	0.091	0.51	0.25-1.05	0.067
	Lip	no observations in multivar			no observations in multivar
	Eyelid	no observations in multivar			no observations in multivar
	Overlapping sites	15.82	1.93-129.87	0.01	14.89	1.81-122.51	0.012
	NOS	0.8	0.60-1.08	0.142	0.77	0.57-1.04	0.093
Facility Type
	Community program	Reference			Reference
	Cancer center	0.89	0.71-1.13	0.35	0.91	0.72-1.15	0.435
	Academic/Research	0.76	0.60-0.96	0.02	0.77	0.60-0.98	0.032
	Integrated network	1.07	0.81-1.41	0.63	1.09	0.82-1.45	0.543
Facility Location*					for CBI = No			for CBI = Yes
	New England	Reference			Reference			Reference
	Middle Atlantic	0.92	0.67-1.25	0.587	0.83	0.59-1.17	0.287	1.56	0.65-3.73	0.32
	South Atlantic	1.03	0.77-1.38	0.831	0.99	0.71-1.36	0.937	1.17	0.52-2.59	0.707
	East North Central	1.01	0.75-1.37	0.934	0.96	0.69-1.33	0.813	1.07	0.44-2.61	0.88
	East South Central	1.01	0.71-1.42	0.977	0.97	0.66-1.42	0.869	0.79	0.28-2.25	0.664
	West North Central	1.3	0.93-1.81	0.12	1.26	0.88-1.81	0.202	1.61	0.63-4.13	0.321
	West South Central	0.79	0.55-1.12	0.189	0.72	0.49-1.05	0.087	1.13	0.35-3.66	0.833
	Mountain	0.98	0.69-1.39	0.906	0.9	0.60-1.34	0.608	1.59	0.66-3.85	0.299
	Pacific	0.86	0.63-1.17	0.339	0.86	0.61-1.20	0.369	0.94	0.40-2.19	0.879
Checkpoint Blockade Immunotherapy
	Yes (Ref no)	0.47	0.39-0.56	<0.001	0.12	0.03-0.49	0.003
Resection of Metastasis*					for CBI = No			for CBI = Yes
	Yes (Ref no)	0.56	0.49-0.65	<0.001	0.52	0.45-0.60	<0.001	1.81	1.22-2.71	0.004
Targeted Therapy*					for CBI = No			for CBI = Yes
	Yes (Ref no)	0.62	0.54-0.72	<0.001	0.59	0.51-0.69	<0.001	1.48	0.88-2.49	0.138
Brain-directed RT Modality *					for CBI = No			for CBI = Yes
	None	Reference			Reference			Reference
	Single-fraction SRS	0.54	0.44-0.65	<0.001	0.5	0.41-0.62	<0.001	1.71	0.85-3.44	0.129
	Hypofractionated SRT	0.88	0.68-1.13	0.32	0.95	0.72-1.23	0.68	0.96	0.37-2.50	0.927
	WBRT	1.03	0.88-1.20	0.728	1.01	0.86-1.19	0.867	1.8	0.92-3.55	0.088
	Other RT regimen	1	0.81-1.22	0.97	1.04	0.83-1.29	0.745	1.35	0.57-3.17	0.496
Site of Other Metastases*					for CBI = No			for CBI = Yes
	MBM-only	Reference			Reference			Reference
	Lung	1.67	1.46-1.91	<0.001	1.67	1.45-1.93	<0.001	1.34	0.83-2.17	0.228
	Liver	1.42	1.06-1.92	0.019	1.36	0.99-1.89	0.06	1.46	0.60-3.52	0.404
	Bone	1.69	1.20-2.39	0.003	1.6	1.09-2.34	0.017	1.78	0.66-4.78	0.252
	Distant Subcut/Skin/LN	0.96	0.61-1.52	0.872	0.8	0.48-1.34	0.399	3.38	0.97-11.74	0.056
*For variables that were significantly associated with receipt of CBI, their interaction effects with CBI were included in a second multivariable Cox regression analysis (displayed in the right half the table).
